# Supplementary material
Source: Frontiers journal article supplement (https://www.frontiersin.org/articles/549740)
Supplement: Data_Sheet_1.ZIP [file Appendix A.docx]

**Appendix A: L1 background of the non-native participants**

| **Language Family / Genus** | **Native Language** | **Classroom Learners** | **Immersion Learners** |
| --- | --- | --- | --- |
| Arabic | Arabic | 1 | 1 |
| Finno-Ugric | Estonian | 2 | 1 |
| Hungarian | 1 | 1 |
| Greek | Greek | 2 | 3 |
| Indo-Aryan | Punjabi | 1 | 1 |
| Sinhalese | 0 | 1 |
| Germanic | Norwegian | 1 | 1 |
| Dutch | 2 | 0 |
| German | 5 | 7 |
| Romance | French | 1 | 8 |
| Italian | 4 | 3 |
| Portuguese | 8 | 2 |
| Romanian | 2 | 0 |
| Spanish | 7 | 8 |
| Slavic | Croatian | 1 | 0 |
| Polish | 3 | 4 |
| Serbian | 2 | 1 |
| Slovak | 1 | 2 |
| Thai | Thai | 1 | 1 |
