# Supplementary material
Source: Frontiers journal article supplement (https://www.frontiersin.org/articles/549740)
Supplement: Data_Sheet_1.ZIP [file Appendix I.docx]

**Appendix I: Model coefficients and performance**

**Table I1**: Estimates for the population level effects in log-odds

| **Population-level effects** | **Estimate** | **Est.Error** | **L-95% CI** | **U-95% CI** |
| --- | --- | --- | --- | --- |
| Intercept | 2.96 | 1.69 | -0.3 | 6.34 |
| wGJT | 0.48 | 2.24 | -3.94 | 4.78 |
| PST | 1.18 | 1.69 | -2.2 | 4.41 |
| immersion | -0.61 | 2.01 | -4.5 | 3.3 |
| classroom | -0.72 | 2.05 | -4.83 | 3.23 |
| wGJT:immersion | 0.03 | 2.89 | -5.64 | 5.67 |
| PST:immersion | 0.02 | 2.01 | -3.88 | 3.94 |
| wGJT:classroom | -0.15 | 2.85 | -5.76 | 5.44 |
| PST:classroom | 0.7 | 2.05 | -3.23 | 4.82 |
| sGJT:native:G | 0.44 | 1.68 | -2.9 | 3.68 |
| wGJT:native:G | 1.15 | 2.09 | -2.89 | 5.28 |
| sGJT:immersion:G | -0.08 | 2.05 | -4.1 | 3.97 |
| wGJT:immersion:G | 0.92 | 2.49 | -3.92 | 5.78 |
| sGJT:classroom:G | -0.26 | 2.05 | -4.25 | 3.76 |
| wGJT:classroomG | 0.62 | 2.43 | -4.15 | 5.37 |
| sGJT:native:U | 0.11 | 1.68 | -3.25 | 3.35 |
| wGJT:native:U | -0.66 | 2.09 | -4.72 | 3.47 |
| sGJT:immersion:U | -0.82 | 2.05 | -4.83 | 3.23 |
| wGJT:immersion:U | -0.87 | 2.48 | -5.72 | 3.99 |
| sGJT:classroom:U | -0.92 | 2.05 | -4.9 | 3.08 |
| wGJT:classroom:U | -0.76 | 2.43 | -5.54 | 3.98 |

The model fully converged (Rhat=1 for all population and group-level effects). To evaluate the model, Bayes R2 was calculated following Gelman et al. (2019) and their supplementary materials (https://avehtari.github.io/bayes_R2/bayes_R2.html). The R2 value is 0.16 (CIs: 0.152, 0.174); such a relatively low R2 value is partially due to the vast majority of responses in the data are correct, meaning that a correct prediction without information is fairly easy, which the R2 penalized. A so-called confusion matrix between predicted and observed responses shows exactly this; the model slightly underestimates incorrect answers. Therefore, the overall accuracy of the model's predictions is very high (0.91), while a measure such as the kappa statistics (taking into account the "difficulty" of correct predictions without information only given the distribution of the responses) is very low (0.12) similarly to the R2 value.

**Table I2**: Confusion matrix between predicted and observed responses

|  | **observed** | |
| --- | --- | --- |
| **predicted** | **0** | **1** |
| **0** | 223 | 158 |
| **1** | 2710 | 29169 |
| **Acurracy** | 0.9111 | |
| **Kappa** | 0.1161 | |

Gelman, A., Goodrich, B., Gabry, J., and Vehtari, A. (2019) R-Squared for Bayesian Regression Models. *The American Statistician* 73, 307–9. doi: [10.1080/00031305.2018.1549100](https://doi.org/10.1080/00031305.2018.1549100).
