# Supplementary material
Source: Frontiers journal article supplement (https://www.frontiersin.org/articles/549740)
Supplement: Data_Sheet_1.ZIP [file List of supplemantary materials.docx]

**List of supplementary materials**

**Appendix A**: L1 background of the non-native participants

**Appendix B**: Stimuli for the grammaticality judgment tasks

**Appendix C**: Constructions tested in the Picture Selection Task

**Appendix D**: Matched sample summary data set (df-summary.csv)

**Appendix** **E**: Full data set in long format (df-long.csv)

**Appendix F:** Full data set in long format (df-long.RDS)

**Appendix G**: Descriptions of the datasets

**Appendix H**: R code used in the analysis (code.R)

**Appendix I**: Model coefficients and performance
